# Supplementary material
Source: PubMed Central journal article supplement (PMC7668659)

**Supplementary file 1:** Length of hospital stay, in Pediatric Intensive Care Unit (PICU) and days under mechanical ventilation in patients included in our series, prior to and following remdesivir (RDV) therapy (*Patient 8 has been excluded*)

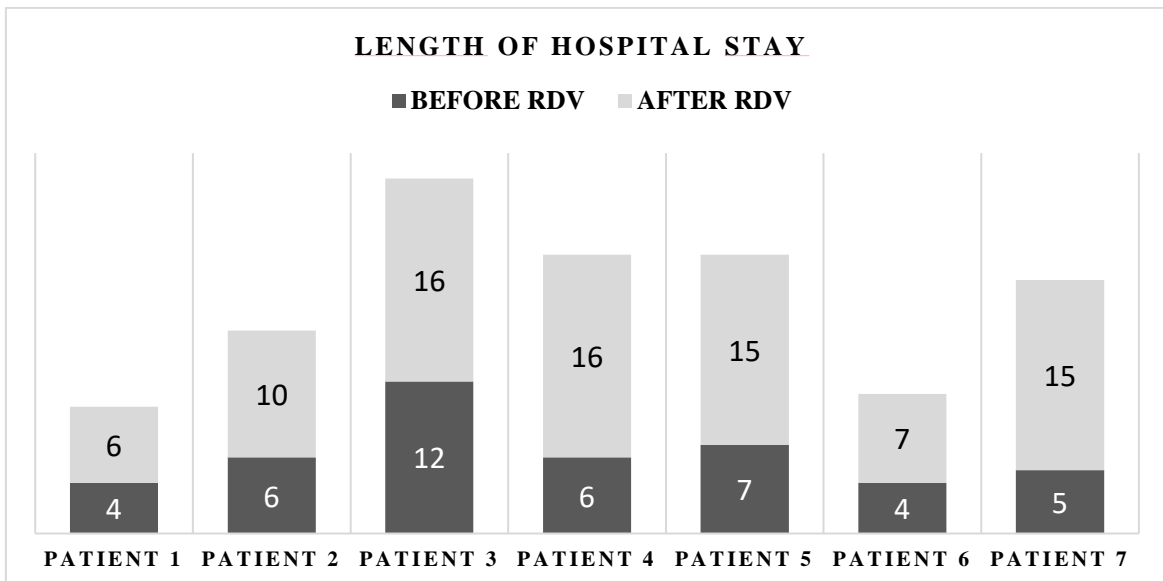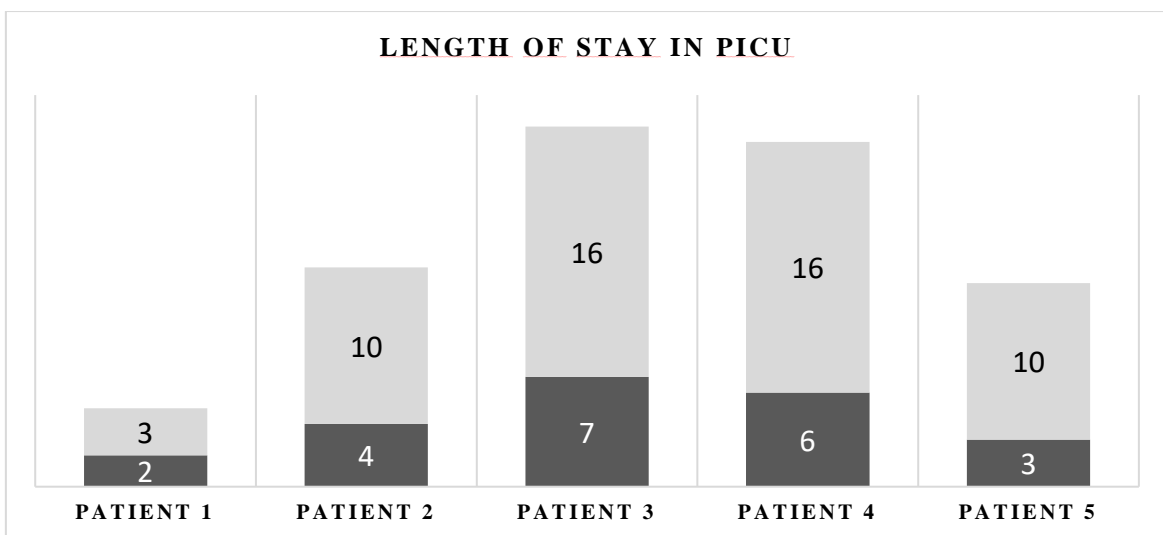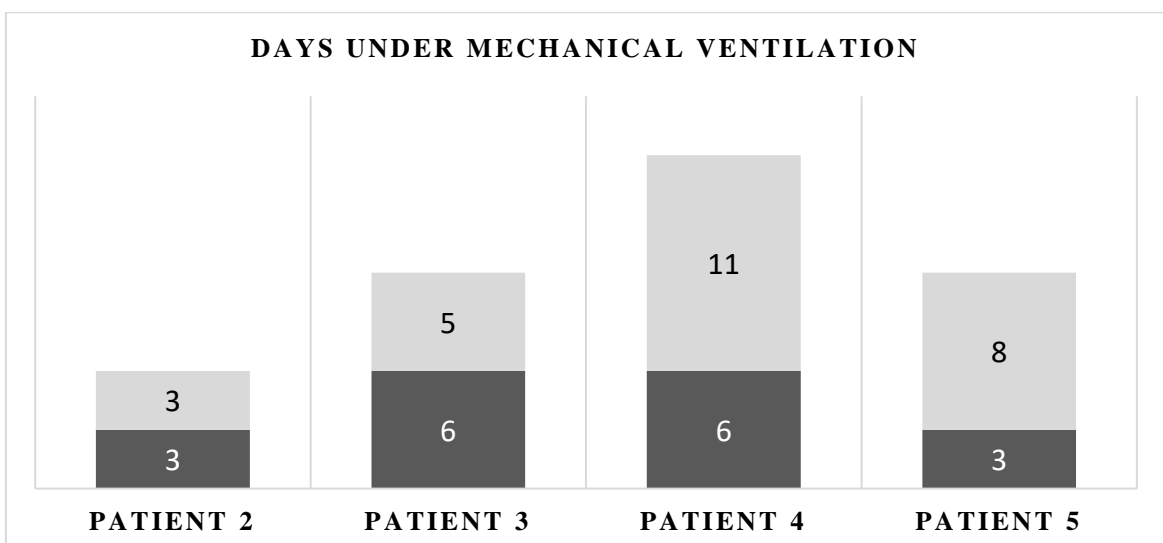

Supplement: 431_2020_3876_MOESM1_ESM.pdf [file 431_2020_3876_MOESM1_ESM.pdf]
